# Supplementary material for: Kank1 Is Essential for Myogenic Differentiation by Regulating Actin Remodeling and Cell Proliferation in C2C12 Progenitor Cells
Source: MDPI journal article supplement (doi:10.3390/cells11132030), 2022-06-26
Supplement: s1 [file s1]

Table S1. Oligonucleotide sequences for transfection

| Gene                  | Primer sequence (5' -3') |
|-----------------------|--------------------------|
| scRNA (control RNA)   | UCACAACCUCCUAGAAAGAGUAGA |
| Kank1 siRNA (siKank1) | CAGAGAAGGACAUGCAGGUUU    |

Table S2. Mouse primer lists and conditions for qRT-PCR

| Gene  | Primer sequence (5' -3') |                        | Product size | Annealing Temp (°C) | Concentration |        | Cycle |
|-------|--------------------------|------------------------|--------------|---------------------|---------------|--------|-------|
|       |                          |                        |              |                     | cDNA          | Primer |       |
| GAPDH | F.P                      | AACATCAAAATGGGGTGAGGCC | 252          | 58                  | 2 ng/ul       | 0.5 μM | 40    |
|       | R.P                      | GTTGTCATGGATGACCTTGGC  |              |                     |               |        |       |
| CCNB1 | F.P                      | GAGCTATCCTCATTTGACTGG  | 125          | 58                  |               |        |       |
|       | R.P                      | CATCTTCTTGGGCACACAAC   |              |                     |               |        |       |
| CCND1 | F.P                      | ACCAATCTCTCTCAACGACCG  | 228          | 58                  |               |        |       |
|       | R.P                      | ACGGAAGGGAAGAGAAGGG    |              |                     |               |        |       |

Table S3. Antibodies list

| Antibody                              | Type       | Targeted species | Manufacturer                                          | Cat. No.  | Dilution ratio * |
|---------------------------------------|------------|------------------|-------------------------------------------------------|-----------|------------------|
| Kank1                                 | Monoclonal | Mouse            | Santa Cruz Biotechnology, Dallas, TX, USA             | sc-517629 | 1:5,000          |
| MyHC                                  | Monoclonal | Mouse            | DSHB, Iowa, IA, USA                                   | MF20      | 1:1,000          |
| MyoD                                  | Monoclonal | Mouse            | Santa Cruz Biotechnology, Dallas, TX, USA             | sc-377460 | 1:1,000          |
| MyoG                                  | Monoclonal | Mouse            | Santa Cruz Biotechnology, Dallas, TX, USA             | sc-12732  | 1:1,000          |
| YAP1                                  | Monoclonal | Rabbit           | Cell Signaling Technology, Danvers, MA, USA           | 14074S    | 1:10,000         |
| pYAP1                                 | Polyclonal | Rabbit           | Cell Signaling Technology, Danvers, MA, USA           | 4911S     | 1:10,000         |
| Lamin B2                              | Monoclonal | Rabbit           | Abcam, Cambridge, United Kingdom                      | ab151735  | 1:2,500          |
| α-Tubulin                             | Monoclonal | Mouse            | DSHB, Iowa City, IA, USA                              | 12G10     | 1:2,000          |
| β-Actin                               | Monoclonal | Rabbit           | Sigma-Aldrich Chemical, St. Louis, USA                | A2066     | 1:10,000         |
| Antibodies HRP-linked anti-rabbit IgG |            |                  | Cell Signaling Technology, Danvers, MA, USA           | #7074     | 1:10,000         |
| Goat anti-mouse(H+L)                  |            |                  | Invitrogen, Thermofisher Scientific, Waltham, MA, USA | #32430    | 1:2,000          |

\*All blots were visualized using a Femto reagent (Thermofisher Scientific).
